# Supplementary material for: The Polymorphisms at PRSS1-PRSS2 and MORC4 Loci and the Risk of Post-ERCP Pancreatitis
Source: Gastroenterol Res Pract. 2018 Nov 4;2018:1064783. doi: 10.1155/2018/1064783 (PMC6247575; doi:10.1155/2018/1064783)
Supplement: Supplementary Materials — PRSS1-PRSS2 (rs10273639) and MORC4 (rs12688220) genotype data. [file 1064783.f1.xlsx]

## Sheet: Sheet1
Number	CaseControl	Age	Gender	RiskGroup	Severity	PRSS	MORC
1	case	76	female	Low	mild pancreatitis	TT	TC
2	case	37	male	high	mild pancreatitis	NA	CC
3	case	64	female	high	mild pancreatitis	TT	TT
4	case	85	female	high	moderate pancreatitis	TC	TC
5	case	58	male	high	mild pancreatitis	TT	TT
6	case	53	male	high	mild pancreatitis	NA	CC
7	case	70	female	high	mild pancreatitis	TC	TC
8	case	63	female	Low	moderate pancreatitis	TT	TT
9	case	74	male	Low	mild pancreatitis	TT	TT
10	case	49	male	high	mild pancreatitis	TC	CC
11	case	77	female	Low	mild pancreatitis	TT	TC
12	case	51	female	high	mild pancreatitis	TT	TC
13	case	59	female	high	mild pancreatitis	TT	TT
14	case	66	female	Low	mild pancreatitis	TC	TC
15	case	49	female	high	mild pancreatitis	NA	TC
16	case	74	female	Low	mild pancreatitis	NA	TC
17	case	49	female	high	mild pancreatitis	TT	TC
18	case	37	male	high	mild pancreatitis	TT	TT
19	case	58	female	high	mild pancreatitis	TT	CC
20	case	80	female	high	mild pancreatitis	TT	TC
21	case	59	male	high	mild pancreatitis	TC	CC
22	case	38	female	high	mild pancreatitis	TT	TT
23	case	81	female	high	mild pancreatitis	TT	TC
24	case	69	female	Low	mild pancreatitis	NA	TC
25	case	29	female	high	severe pancreatitis	TT	TT
26	case	60	male	Low	mild pancreatitis	CC	CC
27	case	62	male	high	mild pancreatitis	NA	CC
28	case	74	male	high	mild pancreatitis	TT	CC
29	case	64	female	high	mild pancreatitis	TT	CC
30	case	54	female	high	mild pancreatitis	TT	TC
31	case	69	female	Low	mild pancreatitis	TT	TC
32	case	63	female	Low	mild pancreatitis	TC	TC
33	case	76	female	Low	mild pancreatitis	TT	TC
34	case	43	female	high	mild pancreatitis	TC	TC
35	case	48	male	high	mild pancreatitis	TT	TT
36	case	66	male	Low	mild pancreatitis	TT	CC
37	case	48	female	high	mild pancreatitis	TC	TC
38	case	71	female	high	mild pancreatitis	TC	TC
39	case	72	female	high	mild pancreatitis	TC	TT
40	case	87	female	Low	mild pancreatitis	TT	CC
41	case	62	female	Low	mild pancreatitis	NA	TC
42	case	25	female	high	mild pancreatitis	TT	TC
43	case	70	female	Low	mild pancreatitis	TT	TC
44	case	58	female	high	mild pancreatitis	TC	TT
45	case	60	female	Low	mild pancreatitis	NA	CC
46	case	53	male	high	mild pancreatitis	NA	TT
47	case	42	female	high	mild pancreatitis	TC	CC
48	case	59	female	high	mild pancreatitis	TT	TT
49	case	64	female	high	moderate pancreatitis	TC	TC
50	control	89	male	Low	no pancreatitis	TT	CC
51	control	64	female	Low	no pancreatitis	TC	TC
52	control	56	female	high	no pancreatitis	TT	CC
53	control	53	female	high	no pancreatitis	TT	TC
54	control	65	male	Low	no pancreatitis	TT	CC
55	control	66	male	high	no pancreatitis	TT	TT
56	control	29	female	Low	no pancreatitis	NA	CC
57	control	60	female	high	no pancreatitis	TT	CC
58	control	32	male	high	no pancreatitis	TT	TT
59	control	88	female	Low	no pancreatitis	TT	CC
60	control	32	female	high	no pancreatitis	TT	TC
61	control	70	female	Low	no pancreatitis	TT	TT
62	control	60	female	Low	no pancreatitis	TT	TT
63	control	60	female	Low	no pancreatitis	TT	TC
64	control	47	male	high	no pancreatitis	CC	CC
65	control	75	female	Low	no pancreatitis	TC	TC
66	control	37	female	high	no pancreatitis	TT	TT
67	control	35	female	high	no pancreatitis	TT	CC
68	control	45	female	high	no pancreatitis	TT	TT
69	control	59	male	high	no pancreatitis	TT	TT
70	control	63	female	Low	no pancreatitis	TC	TC
71	control	55	female	high	no pancreatitis	TT	TC
72	control	85	male	Low	no pancreatitis	TC	TT
73	control	74	female	Low	no pancreatitis	TT	TC
74	control	52	female	high	no pancreatitis	TC	TC
75	control	49	male	high	no pancreatitis	TT	TT
76	control	82	female	Low	no pancreatitis	TC	TC
77	control	89	female	Low	no pancreatitis	TT	TC
78	control	74	male	Low	no pancreatitis	TT	CC
79	control	68	female	Low	no pancreatitis	TT	TC
80	control	52	female	high	no pancreatitis	TT	TT
81	control	73	female	Low	no pancreatitis	TC	TC
82	control	77	female	high	no pancreatitis	TC	TC
83	control	41	male	Low	no pancreatitis	TT	TT
84	control	71	female	high	no pancreatitis	TT	TC
85	control	48	male	high	no pancreatitis	TT	TT
86	control	47	male	high	no pancreatitis	TT	CC
87	control	37	female	high	no pancreatitis	NA	NA
88	control	71	male	Low	no pancreatitis	TT	TT
89	control	83	female	high	no pancreatitis	NA	TT
90	control	48	male	high	no pancreatitis	NA	TT
91	control	71	female	high	no pancreatitis	NA	TT
92	control	49	male	high	no pancreatitis	TC	TT
93	control	62	male	Low	no pancreatitis	NA	TT
94	control	83	male	Low	no pancreatitis	TT	TT
95	control	64	male	high	no pancreatitis	TT	TT
96	control	49	male	high	no pancreatitis	TT	TT
97	control	53	female	high	no pancreatitis	TT	TC
98	control	58	female	Low	no pancreatitis	NA	NA
99	control	68	male	Low	no pancreatitis	NA	NA
100	control	21	male	Low	no pancreatitis	TT	TT
100	control	72	female	high	no pancreatitis	TT	TC
101	control	62	male	high	no pancreatitis	TT	CC
102	control	56	female	high	no pancreatitis	TT	TC
103	control	39	male	Low	no pancreatitis	TT	TT
104	control	42	male	high	no pancreatitis	TT	CC
105	control	67	male	high	no pancreatitis	TC	CC
106	control	35	female	high	no pancreatitis	TT	CC
107	control	54	female	high	no pancreatitis	TT	TT
108	control	55	female	high	no pancreatitis	TT	CC
110	control	73	female	high	no pancreatitis	TC	CC
111	control	48	male	high	no pancreatitis	TT	CC
112	control	59	male	high	no pancreatitis	TC	TT
113	control	79	female	high	no pancreatitis	TC	CC
113	control	79	female	Low	no pancreatitis	TC	CC
114	control	82	male	high	no pancreatitis	TC	CC
115	control	66	female	Low	no pancreatitis	TC	CC
116	control	55	male	high	no pancreatitis	TT	CC
117	control	71	female	high	no pancreatitis	TC	CC
118	control	45	male	high	no pancreatitis	TT	CC
119	control	74	female	high	no pancreatitis	TT	TC
120	control	50	male	high	no pancreatitis	TC	CC
121	control	37	male	high	no pancreatitis	TT	CC
122	control	49	female	Low	no pancreatitis	TT	TC
123	control	60	female	high	no pancreatitis	TT	CC
124	control	76	male	Low	no pancreatitis	TT	CC
125	control	52	female	high	no pancreatitis	TT	CC
126	control	81	female	high	no pancreatitis	TT	TC
128	control	75	female	high	no pancreatitis	TT	TC
129	control	51	female	high	no pancreatitis	TT	TT
130	control	47	female	high	no pancreatitis	TC	TT
131	control	59	female	high	no pancreatitis	TT	TC
132	control	38	male	high	no pancreatitis	TT	CC
133	control	33	male	high	no pancreatitis	TT	TT
134	control	49	female	Low	no pancreatitis	TT	CC
135	control	59	male	Low	no pancreatitis	TC	TT
136	control	71	female	Low	no pancreatitis	TC	CC
137	control	70	female	Low	no pancreatitis	TC	CC
139	control	56	female	high	no pancreatitis	TT	CC
140	control	66	female	Low	no pancreatitis	TT	CC
141	control	72	female	high	no pancreatitis	TT	TC
142	control	69	female	high	no pancreatitis	TT	TT
143	control	87	female	high	no pancreatitis	TC	CC
144	control	55	female	high	no pancreatitis	TT	TC
145	control	45	female	high	no pancreatitis	TT	TT
146	control	54	male	Low	no pancreatitis	TT	TT
147	control	67	female	high	no pancreatitis	TT	TC
148	control	52	male	Low	no pancreatitis	TC	TT
149	control	86	female	high	no pancreatitis	TT	CC
150	control	67	male	high	no pancreatitis	TT	CC
